# Supplementary material
Source: PubMed Central journal article supplement (PMC7584437)
Supplement: mmc1.pdf [file mmc1.pdf]

**Structure, Volume 28**

**Supplemental Information**

**Malleability of the SARS-CoV-2 3CL M<sup>pro</sup>**

**Active-Site Cavity Facilitates**

**Binding of Clinical Antivirals**

**Daniel W. Kneller, Stephanie Galanie, Gwyndalyn Phillips, Hugh M. O'Neill, Leighton Coates, and Andrey Kovalevsky**

## Supplemental Information

### Malleability of the SARS-CoV-2 3CL M<sup>Pro</sup> active site cavity facilitates binding of clinical antivirals

Daniel W. Kneller,<sup>1,2</sup> Stephanie Galanie,<sup>2,3</sup> Gwyndalyn Phillips,<sup>1,2</sup> Hugh M. O'Neill,<sup>1,2</sup> Leighton Coates,<sup>2,4\*</sup> and Andrey Kovalevsky,<sup>1,2\*<sup>‡</sup></sup>

<sup>1</sup>*Neutron Scattering Division, Oak Ridge National Laboratory, 1 Bethel Valley Road, Oak Ridge, TN, 37831, USA*

<sup>2</sup>*National Virtual Biotechnology Laboratory, US Department of Energy*

<sup>3</sup>*Biosciences Division, Oak Ridge National Laboratory, 1 Bethel Valley Road, Oak Ridge, TN, 37831, USA*

<sup>4</sup>*Second Target Station, Oak Ridge National Laboratory, 1 Bethel Valley Road, Oak Ridge, TN, 37831, USA*

<sup>‡</sup>Lead contact

\*Corresponding Authors: Leighton Coates: [coatesl@ornl.gov](mailto:coatesl@ornl.gov), Andrey Kovalevsky: [kovalevskyay@ornl.gov](mailto:kovalevskyay@ornl.gov)

**Table S1.** Data reduction and refinement statistics for the room temperature structures the 3CL M<sup>pro</sup> from SARS-CoV-2 in complexes with inhibitors. Related to Figure 1.

|                                                     | <b>3CL M<sup>pro</sup>-Leupeptin</b><br>(293K)<br>PDB ID 6XCH | <b>3CL M<sup>pro</sup>-Telaprevir</b><br>(293K)<br>PDB ID 6XQS | <b>3CL M<sup>pro</sup>-Narlaprevir</b><br>(293K)<br>PDB ID 6XQT | <b>3CL M<sup>pro</sup>-Boceprevir</b><br>(293K)<br>PDB ID 6XQU |
|-----------------------------------------------------|---------------------------------------------------------------|----------------------------------------------------------------|-----------------------------------------------------------------|----------------------------------------------------------------|
| <b>Data collection:</b>                             | <b>X-ray (in-house)</b>                                       | <b>X-ray (in-house)</b>                                        | <b>X-ray (in-house)</b>                                         | <b>X-ray (in-house)</b>                                        |
| Diffractionmeter                                    | Rigaku HighFlux<br>Eiger 4M                                   | Rigaku HighFlux<br>Eiger 4M                                    | Rigaku HighFlux<br>Eiger 4M                                     | Rigaku HighFlux<br>Eiger 4M                                    |
| Space group                                         | I2                                                            | C2                                                             | P2 <sub>1</sub>                                                 | I2                                                             |
| Wavelength (Å)                                      | 1.5406                                                        | 1.5406                                                         | 1.5406                                                          | 1.5406                                                         |
| Cell dimensions:                                    |                                                               |                                                                |                                                                 |                                                                |
| <i>a, b, c</i> (Å)                                  | 45.59, 53.35, 113.19                                          | 110.64, 55.60, 48.74                                           | 46.50, 54.48, 114.53                                            | 46.28, 53.46, 113.10                                           |
| <i>a, b, g</i> (°)                                  | 90, 101.02, 90                                                | 90, 101.26, 90                                                 | 90, 101.52, 90                                                  | 90, 100.95, 90                                                 |
| Resolution (Å)                                      | 55.60-2.20 (2.28-2.20)*                                       | 55.24-1.90 (1.97-1.90)                                         | 112.2-2.30 (2.38-2.30)                                          | 55.57-2.20 (2.28-2.20)                                         |
| No. reflections unique                              | 13712 (1374)                                                  | 22393 (1803)                                                   | 25255 (2513)                                                    | 13888 (1387)                                                   |
| <i>R</i> <sub>merge</sub>                           | 0.096 (0.503)                                                 | 0.044 (0.308)                                                  | 0.119 (0.752)                                                   | 0.111 (0.654)                                                  |
| <i>R</i> <sub>pim</sub>                             | 0.061 (0.320)                                                 | 0.026 (0.263)                                                  | 0.066 (0.412)                                                   | 0.062 (0.385)                                                  |
| <i>CC</i> <sub>1/2</sub>                            | 0.987 (0.696)                                                 | 0.998 (0.838)                                                  | 0.988 (0.518)                                                   | 0.991 (0.441)                                                  |
| <i>I</i> / $\sigma$ <i>I</i>                        | 9.84 (1.86)                                                   | 20.9 (2.29)                                                    | 6.7 (0.72)                                                      | 10.4 (1.21)                                                    |
| Completeness (%)                                    | 97.9 (97.6)                                                   | 97.3 (78.3)                                                    | 99.9 (99.4)                                                     | 99.8 (99.7)                                                    |
| Redundancy                                          | 3.4 (3.3)                                                     | 3.3 (1.8)                                                      | 4.1 (4.1)                                                       | 4.3 (3.9)                                                      |
| <b>Refinement:</b>                                  |                                                               |                                                                |                                                                 |                                                                |
| <i>R</i> <sub>work</sub> / <i>R</i> <sub>free</sub> | 0.1970/0.2370                                                 | 0.1710/0.2039                                                  | 0.2254/0.2769                                                   | 0.1760/0.2338                                                  |
| Ramachandran statistics                             |                                                               |                                                                |                                                                 |                                                                |
| Favored (%)                                         | 96.05                                                         | 97.37                                                          | 94.08                                                           | 96.05                                                          |
| Allowed (%)                                         | 3.95                                                          | 2.63                                                           | 5.92                                                            | 3.95                                                           |
| Outliers (%)                                        | 0                                                             | 0                                                              | 0                                                               | 0                                                              |
| R.M.S. deviations                                   |                                                               |                                                                |                                                                 |                                                                |
| Bond lengths (Å)                                    | 0.003                                                         | 0.012                                                          | 0.006                                                           | 0.008                                                          |
| Bond angles (°)                                     | 0.645                                                         | 1.119                                                          | 0.937                                                           | 1.064                                                          |
| All atom clashscore                                 | 3.37                                                          | 3.95                                                           | 5.53                                                            | 3.81                                                           |

\* Values in parentheses are for the highest-resolution shell.

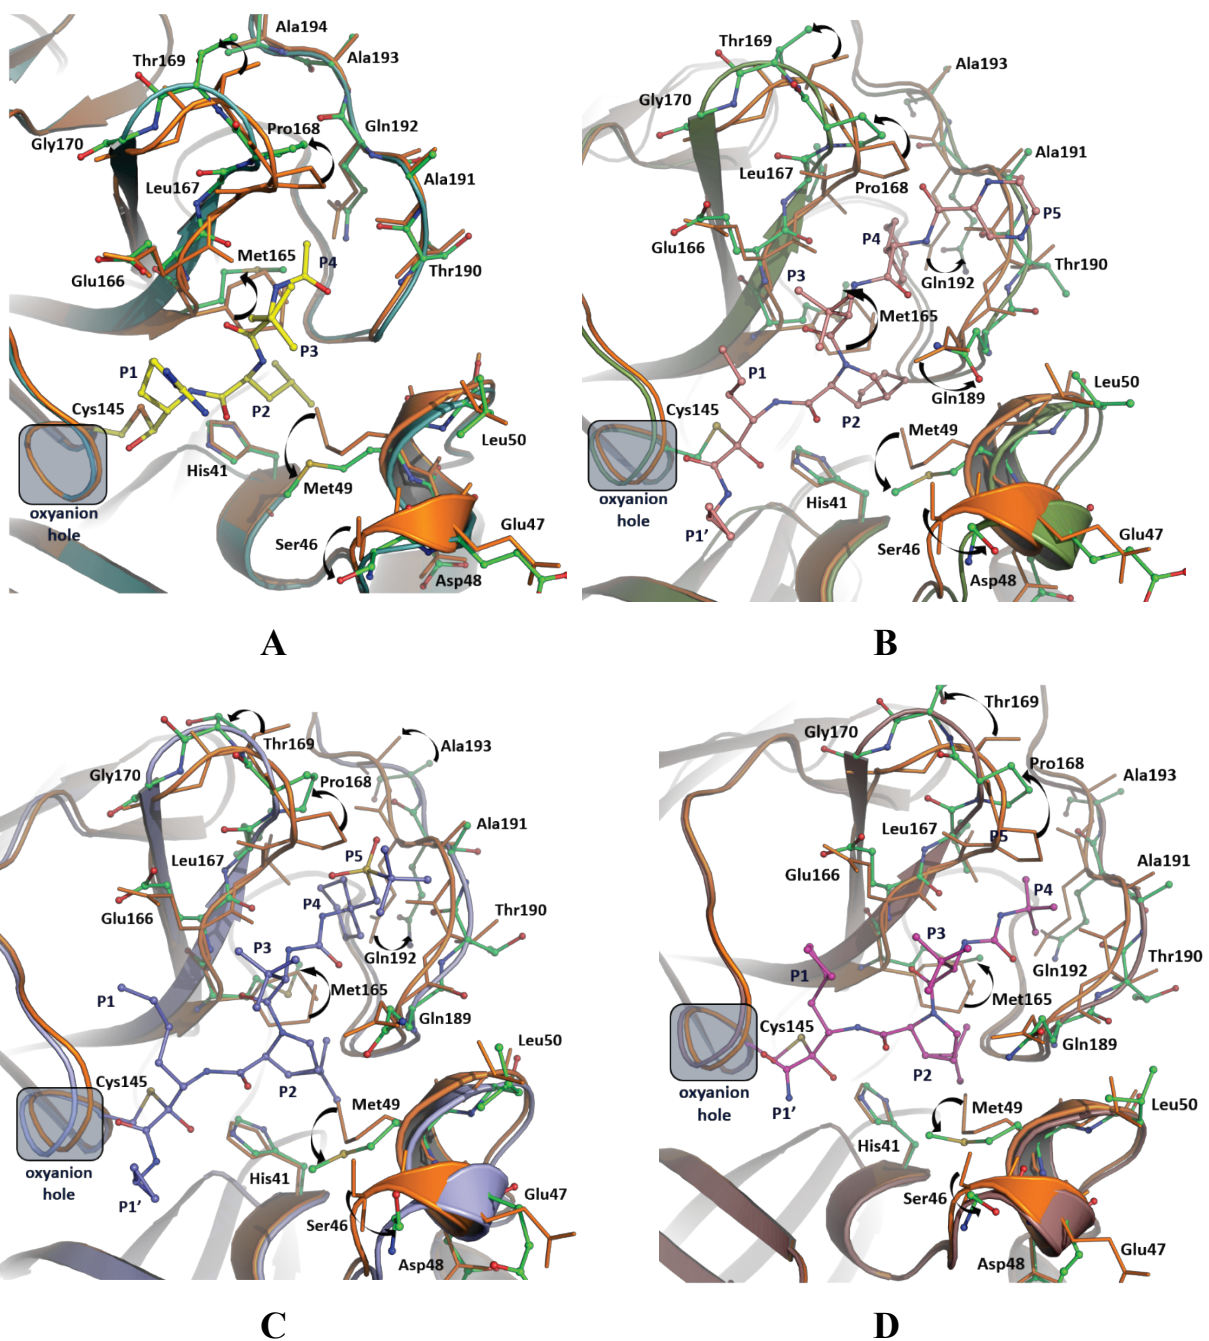

**Figure S1. Conformational changes of the active site cavity caused by the inhibitor binding.** (A) 3CL M<sup>pro</sup>-leupeptin complex is shown in ball-and-stick representation (yellow and green carbons) and dark teal cartoon. (B) 3CL M<sup>pro</sup>-telaprevir complex is shown in ball-and-stick representation (dark pink and green carbons) and smudge cartoon. (C) 3CL M<sup>pro</sup>-narlaprevir complex. (D) 3CL M<sup>pro</sup>-boceprevir complex. Ligand-free enzyme (PDB ID 6WQF) is shown in stick representation and is colored orange in all panels. Related to Figure 4.

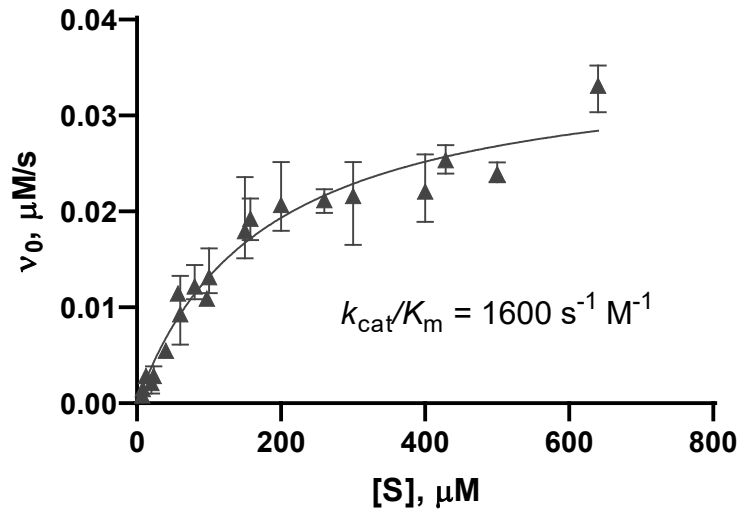

**Figure S2. SARS-CoV-2 main protease kinetic characterization.** Points represent the average of  $n = 3$  initial rates of FRET peptide substrate cleavage by 130 nM enzyme over a range of substrate concentrations. Error bars represent the standard deviations of these triplicates, and two independent experiments are plotted with slightly different substrate concentrations. The line indicates the nonlinear regression of the Michaelis-Menten equation to the data with GraphPad Prism v. 8.4.2. The best-fit parameters were  $V_{\max} = 36$  nM/s EDANS released/second 95% CI [32, 41], giving  $k_{cat} = 0.28$  s<sup>-1</sup>, and  $K_M = 170$  μM peptide substrate 95% CI [130, 230]. Related to STAR Methods.

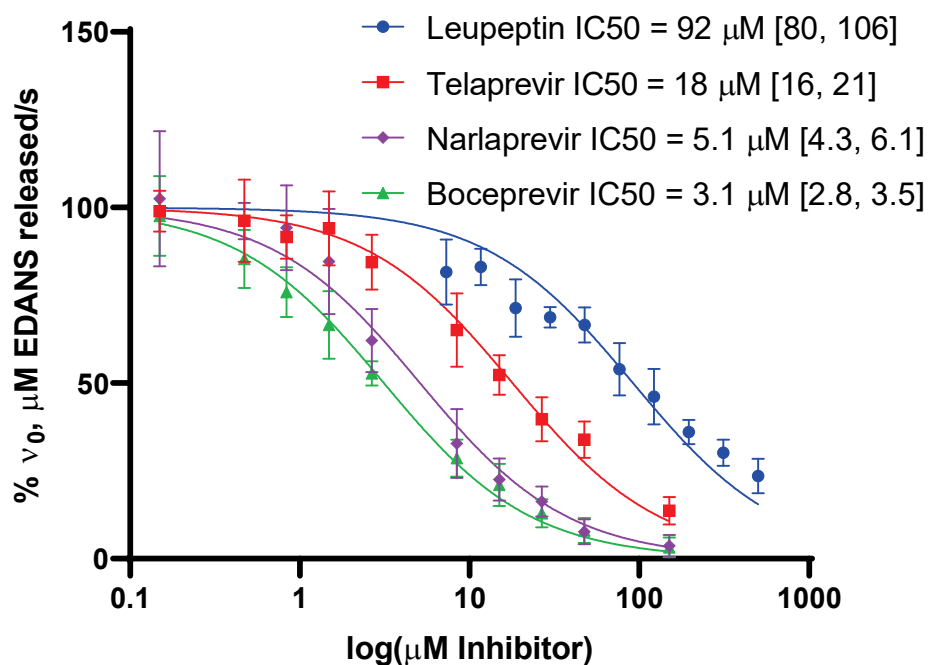

**Figure S3. *In vitro* biochemical inhibition of main protease.** Initial rates across the concentration range are normalized to no inhibitor control (100% activity) and no enzyme control (0% activity). Error bars are standard deviation of two independent experiments, each performed in triplicate. Lines indicate the nonlinear regression of the [Inhibitor] vs. normalized response IC<sub>50</sub> equation to the data with GraphPad Prism. Bracketed values in the legend represent 95% confidence intervals for IC<sub>50</sub> from the regression. Related to STAR Methods.

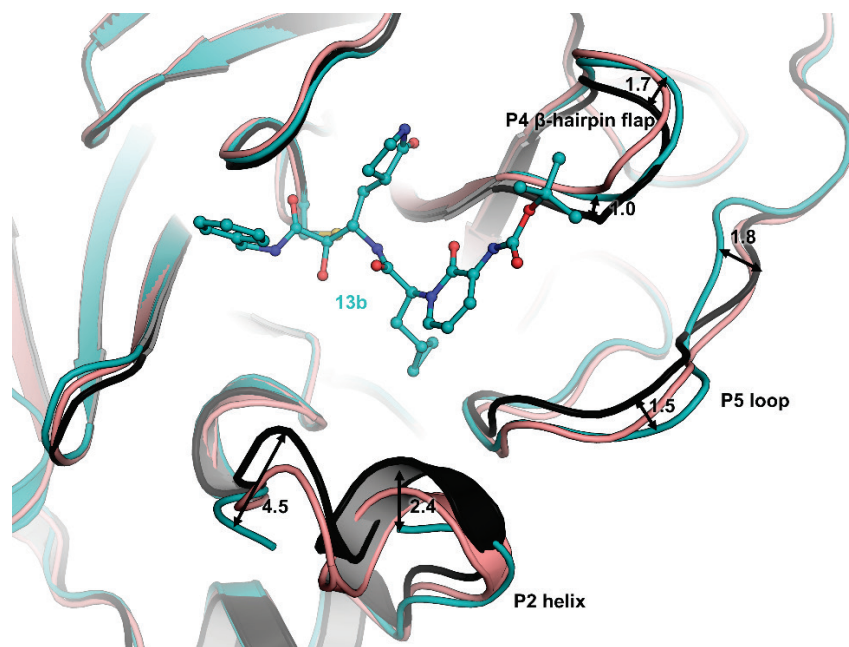

A

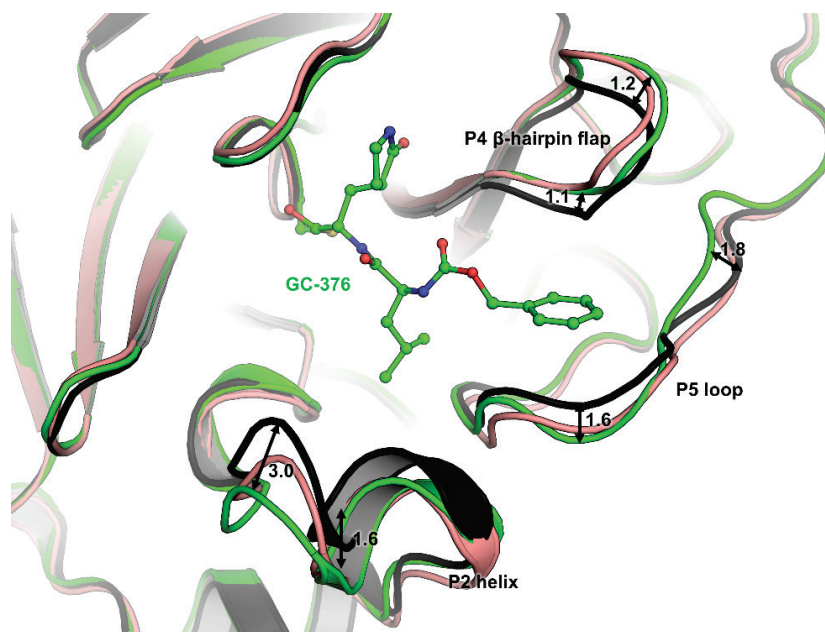

B

**Figure S4. Comparison of the conformational changes of the active site cavity in SARS-CoV-2 3CL M<sup>Pro</sup> caused by inhibitor binding.** (A) Ligand-free 3CL M<sup>Pro</sup> (PDB ID 6WQF) shown in black is superimposed with 3CL M<sup>Pro</sup>-13b (PDB ID 6Y2F) and 3CL M<sup>Pro</sup>-telaprevir complexes shown in cyan and dark pink, respectively. The ketoamide inhibitor 13b is shown in ball-and-stick representation. (B) Ligand-free 3CL M<sup>Pro</sup> (PDB ID 6WQF) shown in black is superimposed with 3CL M<sup>Pro</sup>-GC-376 (PDB ID 6WTT) and 3CL M<sup>Pro</sup>-telaprevir complexes shown in green and dark pink, respectively. The aldehyde inhibitor GC-376 is shown in ball-and-stick representation. Related to Figure 4.
